# Supplementary material for: Does Hair Dye Use Increase the Risk of Breast Cancer? A Population-Based Case-Control Study of Finnish Women
Source: PubMed Central journal article supplement (PMC4532449; doi:10.1371/journal.pone.0135190), 2015-08-11
Supplement: pone.0135190.s003.pdf [file pone.0135190.s003.pdf]

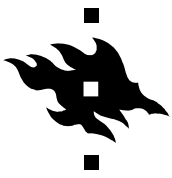

Helsingin yliopiston Kansanterveystieteen laitoksen tutkimus:

# Naisten terveys ja hormonien käyttö

Tutkimusryhmämme selvittää HORMONIVALMISTEIDEN KÄYTÖN ja NAISTEN TERVEYDEN SUHDETTA. Tässä kyselylomakkeessa on pyritty kattavasti huomioimaan tärkeimmät rintasyövän riskitekijät sekä tekijöitä, joista ei ole riittävää tietoa.

Olet mukana Suomen väestöstä tehdyn neljänsäntuhannen naisen otannan perusteella.

Jotta tutkimuksen tulokset olisivat luotettavia, on tärkeää, että kaikki lomakkeen saaneet vastaavat.

Voit jättää vastauksesi oheisessa palautuskuoressa ilman postimerkkiä postin kuljetettavaksi.

Kiitämme jo etukäteen siitä, että jaksat vastata kaikkiin kysymyksiin.

**HUOMAA!** Henkilöllisyytesi ja tietosi pidetään täysin salassa. Tutkimuksen tuloksia ei tarkastella henkilöittäin, vaan ne esitetään tilastollisina kokonaisuuksina taulukoiden muodossa.

## VASTAAMISOHJEET

Rastita kunkin kysymyksen / osakysymyksen kohdalla vain yksi vaihtoehto, paitsi kysymyksissä 32 ja 42, joissa voi rastittaa useampia vaihtoehtoja.

Käytä kuulakärkikynää, koska tämä kysely tallennetaan optisella laitteella.

### Vastausmalli 1:

#### Kuinka usein syöt seuraavia ruokia?

|                      | Päivittäin                          | Noin 3-6 päivänä viikossa | Noin 4-10 päivänä kuukaudessa | Noin 1-2 päivänä kuukaudessa | Harvemmin tai ei koskaan            |
|----------------------|-------------------------------------|---------------------------|-------------------------------|------------------------------|-------------------------------------|
| Ruisleipää           | <input checked="" type="checkbox"/> | <input type="checkbox"/>  | <input type="checkbox"/>      | <input type="checkbox"/>     | <input type="checkbox"/>            |
| Tuoreita hedelmiä    | <input checked="" type="checkbox"/> | <input type="checkbox"/>  | <input type="checkbox"/>      | <input type="checkbox"/>     | <input type="checkbox"/>            |
| Lohta tai kirjolohta | <input type="checkbox"/>            | <input type="checkbox"/>  | <input type="checkbox"/>      | <input type="checkbox"/>     | <input checked="" type="checkbox"/> |

Rastit näin, kun syöt päivittäin ruisleipää ja tuoreita vihanneksia, mutta et lainkaan lohikalaa.

### Vastausmalli 2:

#### Kuinka paljon painat? merkitse ruutuun sadat kilot, kymmenkilot ja kilot

|                |                                     |                          |                                     |                          |                          |                          |                          |                                     |                          |                          |
|----------------|-------------------------------------|--------------------------|-------------------------------------|--------------------------|--------------------------|--------------------------|--------------------------|-------------------------------------|--------------------------|--------------------------|
|                | 0                                   | 1                        | 2                                   |                          |                          |                          |                          |                                     |                          |                          |
| sadat kilot    | <input checked="" type="checkbox"/> | <input type="checkbox"/> | <input type="checkbox"/>            |                          |                          |                          |                          |                                     |                          |                          |
| kymmenet kilot | <input type="checkbox"/>            | <input type="checkbox"/> | <input type="checkbox"/>            | <input type="checkbox"/> | <input type="checkbox"/> | <input type="checkbox"/> | <input type="checkbox"/> | <input checked="" type="checkbox"/> | <input type="checkbox"/> | <input type="checkbox"/> |
| kilot          | <input type="checkbox"/>            | <input type="checkbox"/> | <input checked="" type="checkbox"/> | <input type="checkbox"/> | <input type="checkbox"/> | <input type="checkbox"/> | <input type="checkbox"/> | <input type="checkbox"/>            | <input type="checkbox"/> | <input type="checkbox"/> |

Merkitset näin, jos painat 72 kiloa

### Vastausmalli 3:

#### Mitä vitamiineja käytät tällä hetkellä?

*C-vitamiinia ja D-vitamiinia*

Näin kirjoitat, jos käytät tällä hetkellä vain C- ja D-vitamiinia.

## TÄSTÄ ALKAVAT VARSINAISET KYSYMYKSET

### 1. Oletko ollut koskaan raskaana?

- kyllä
- en koskaan, siirry kysymykseen 7.

### 2. Kuinka monta lasta olet synnyttänyt?

- yhden
- kaksi
- kolme - neljä
- viisi - kuusi
- seitsemän tai enemmän

### 3. Minkä ikäisenä synnytit ensimmäisen lapsesi? Olin...

- 15 vuotias tai nuorempi
- 16-20-vuotias
- 21-25-vuotias
- 26-30-vuotias
- 31-35-vuotias
- 36-40-vuotias
- 41-vuotias tai vanhempi

### 4. Kuinka monta keskenmenoa tai aborttia sinulla on ollut?

- ei yhtään
- yksi
- kaksi - kolme
- neljä tai useampi

### 5. Oletko koskaan imettänyt?

- kyllä
- en, siirry kysymykseen 7.

**6. Kuinka pitkän ajan olet imettänyt yhteensä, kun kaikki lapsesi otetaan huomioon?**

- en ollenkaan
- viikon
- kaksi - kolme viikkoa
- kuukauden
- kaksi - kolme kuukautta
- neljä - viisi kuukautta
- puoli vuotta - vuoden
- yli vuoden, mutta alle kaksi vuotta
- kaksi vuotta tai enemmän

**7. Oletko koskaan käyttänyt raskauden ehkäisyyn ehkäisytabletteja, ehkäisykannoita tai pistoksina tai ihonalaisena kapselina annettavaa hormoniehkäisyä?**

- kyllä
- en, siirry kysymykseen 10.

**8. Minkä ikäisenä aloitit käyttää raskauden ehkäisyyn ehkäisytabletteja, ehkäisykannoita tai pistoksina tai ihonalaisena kapselina annettavaa hormoniehkäisyä? Olin..**

- 15 vuotias tai nuorempi
- 16-20-vuotias
- 21-25-vuotias
- 26-30-vuotias
- 31-35-vuotias
- 36-40-vuotias
- 41-vuotias tai vanhempi
- en osaa sanoa

**9. Käytätkö nyt raskauden ehkäisyyn ehkäisytabletteja, ehkäisykannoita tai pistoksina tai ihonalaisena kapselina annettavaa hormoniehkäisyä?**

- kyllä
- en

**10. Oletko koskaan käyttänyt hormonivalmisteita puuttuvien, kivuliaiden tai epäsäännöllisten kuukautisten hoitoon tai aknen (finnien) hoitoon?**

- kyllä
- en, siirry kysymykseen 12.

**11. Minkä ikäisenä aloit käyttää hormonivalmisteita puuttuvien, kivuliiden tai epäsäännöllisten kuukautisten hoitoon tai aknen (finnien) hoitoon? Olin..**

- 15 vuotias tai nuorempi
- 16-20-vuotias
- 21-25-vuotias
- 26-30-vuotias
- 31-35-vuotias
- 36-40-vuotias
- 41-vuotias tai vanhempi
- en osaa sanoa

**12. Kuinka pitkän ajan yhteensä olet käyttänyt ehkäisytabletteja, ehkäisykannoita tai pistoksena tai ihonalaisena kapselina annettavaa hormonivalmisteita ehkäisyyn, puuttuvien, kivuliiden tai epäsäännöllisten kuukautisten hoitoon tai aknen (finnien) hoitoon? (yritä arvioida käytön yhteenlaskettua aikaa)**

- En ole koskaan käyttänyt, siirry kysymykseen 15.
- alle kuukauden
- kuukauden - puolen vuoden ajan
- yli puoli vuotta, mutta alle kaksi vuotta
- kaksi - neljä vuotta
- yli neljä vuotta - kahdeksan vuotta
- yli kahdeksan vuotta - kaksitoista vuotta
- yli kaksitoista vuotta - kuusitoista vuotta
- yli kuusitoista vuotta - kaksikymmentä vuotta
- yli kaksikymmentä vuotta - kaksikymmentäviisi vuotta
- yli kaksikymmentäviisi vuotta

**13. Kuinka vanhana lopetit kaikki ehkäisytablettien, ehkäisykannojen tai pistoksena tai ihonalaisena kapselina annettavien hormonivalmisteiden käytön? Huomioi vastauksessasi ehkäisy, puuttuvien tai epäsäännöllisten kuukautisten hoito tai aknen (finnien) hoito.**

- en ole vielä lopettanut
- 15 vuotias tai nuorempi
- 16-20-vuotias
- 21-25-vuotias
- 26-30-vuotias
- 31-35-vuotias
- 36-40-vuotias
- 41-vuotias tai vanhempi

**14. Voitko yrittää palauttaa mieleen, mitä ehkäisy pillereitä, ehkäisy laastareita tai pistoksina tai ihonalaisena kapselina annettavia hormonivalmisteita olet käyttänyt? Merkitse seuraavaan taulukkoon valmisteen nimi, käytön aloittamisvuosi ja lopettamisvuosi sekä syy lopettamiseen (esim sivuvaikutus, haluttu raskaus).**

| Valmisteen nimi | käytön    |          | käytön          |          | lopettamisen syy |
|-----------------|-----------|----------|-----------------|----------|------------------|
|                 | alkuvuosi | kuukausi | lopettamisvuosi | kuukausi |                  |
|                 |           |          |                 |          |                  |
|                 |           |          |                 |          |                  |
|                 |           |          |                 |          |                  |
|                 |           |          |                 |          |                  |
|                 |           |          |                 |          |                  |

**15. Oletko koskaan käyttänyt hormonikierukkaa (esim Levonova, Mirena) tai ehkäisykierukkaa (esim kuparikierukkaa) ? Jos et ole käyttänyt koskaan mitään ehkäisykierukkaa, siirry kysymykseen 17.**

**a. kuparikierukkaa**

- kyllä
- en
- en osaa sanoa

**b. hormonikierukkaa**

- kyllä
- en
- en osaa sanoa

**c. muuta ehkäisykierukkaa**

- kyllä
- en
- en osaa sanoa

**16. Voitko yrittää palauttaa mieleen, mitä ehkäisykierukkaa olet käyttänyt? Merkitse seuraavaan taulukkoon valmisteen nimi, käytön aloittamisvuosi ja lopettamisvuosi.**

| Kierukan nimi | käytön    |          | käytön          |          | käytön lopettamisen syy (esim. raskaus) |
|---------------|-----------|----------|-----------------|----------|-----------------------------------------|
|               | alkuvuosi | kuukausi | lopettamisvuosi | kuukausi |                                         |
|               |           |          |                 |          |                                         |
|               |           |          |                 |          |                                         |
|               |           |          |                 |          |                                         |
|               |           |          |                 |          |                                         |
|               |           |          |                 |          |                                         |

**17. Minkä ikäinen olit, kun sinulla oli ensimmäiset kuukautiset?**

- |                                                                   |                                                  |
|-------------------------------------------------------------------|--------------------------------------------------|
| <input type="checkbox"/> minulla ei ole koskaan ollut kuukautisia | <input type="checkbox"/> 18-vuotias              |
| <input type="checkbox"/> 12-vuotias tai nuorempi                  | <input type="checkbox"/> 19-vuotias              |
| <input type="checkbox"/> 13-vuotias                               | <input type="checkbox"/> 20-vuotias              |
| <input type="checkbox"/> 14-vuotias                               | <input type="checkbox"/> 21-vuotias              |
| <input type="checkbox"/> 15-vuotias                               | <input type="checkbox"/> 22-vuotias tai vanhempi |
| <input type="checkbox"/> 16-vuotias                               | <input type="checkbox"/> en osaa sanoa           |
| <input type="checkbox"/> 17-vuotias                               |                                                  |

**18. Onko sinulla edelleen kuukautiset?**

- ei, koska olen raskaana
- ei, koska kohtuni on poistettu
- kyllä, säännölliset
- kyllä, epäsäännölliset
- en ole varma, koska ne ovat epäsäännölliset
- kuukautiseni ovat palanneet hormonihoidon takia
- ei, kuukautiseni ovat pysyvästi loppuneet luonnollisella tavalla.

Kuinka vanha olit silloin?

|  |  |
|--|--|
|  |  |
|--|--|

**19. Oletko saanut vaihdevuosien tai munasarjojen poiston vuoksi hormonikorvaushoitoa?**

- kyllä
- en, siirry kysymykseen 25.
- en osaa sanoa

**20. Kuinka vanha olit, kun hormonikorvaushoito alkoi?**

- |                                                  |                                                  |
|--------------------------------------------------|--------------------------------------------------|
| <input type="checkbox"/> 40-vuotias tai nuorempi | <input type="checkbox"/> 56-60-vuotias           |
| <input type="checkbox"/> 41-45-vuotias           | <input type="checkbox"/> 61-65-vuotias           |
| <input type="checkbox"/> 46-50-vuotias           | <input type="checkbox"/> 66-vuotias tai vanhempi |
| <input type="checkbox"/> 51-55-vuotias           | <input type="checkbox"/> en osaa sanoa           |

**21. Käytätkö tällä hetkellä hormonikorvaushoitoa?**

- kyllä
- en

## 22. Kuinka vanhana lopetit hormonikorvaushoidon?

- 40-vuotias tai nuorempi     61-65-vuotias  
 41-45-vuotias     66-70-vuotias  
 46-50-vuotias     71-75-vuotias  
 51-55-vuotias     76-vuotias tai vanhempi  
 56-60-vuotias

## 23. Kauanko olet käyttänyt hormonikorvaushoitoa yhteensä? (yritä arvioida käytön yhteenlaskettua aikaa)

- alle kuukauden  
 kuukauden - puolen vuoden ajan  
 yli puoli vuotta, mutta alle kaksi vuotta  
 kaksi - neljä vuotta  
 yli neljä vuotta - kahdeksan vuotta  
 yli kahdeksan vuotta - kaksitoista vuotta  
 yli kaksitoista vuotta - kuusitoista vuotta  
 yli kuusitoista vuotta - kaksikymmentä vuotta  
 yli kaksikymmentä vuotta - kaksikymmentäviisi vuotta  
 yli kaksikymmentäviisi vuotta

## 24. Voitko yrittää palauttaa mieleen, mitä hormonikorvaushoitoa olet saanut?

**Merkitse seuraavaan taulukkoon valmisteen nimi, käytön aloittamisvuosi ja lopettamisvuosi sekä syy lopettamiseen (esim sivuvaikutus)**

| Valmisteen nimi | käytön<br>alkuvuosi | käytön<br>lopettamisvuosi | lopettamisen syy |
|-----------------|---------------------|---------------------------|------------------|
|                 |                     |                           |                  |
|                 |                     |                           |                  |
|                 |                     |                           |                  |
|                 |                     |                           |                  |
|                 |                     |                           |                  |
|                 |                     |                           |                  |

## 25. Oletko koskaan tutkinut, onko rinnoissasi kyhmyjä

- en, siirry kysymykseen 27.  
 kyllä



**26. Kuinka usein tutkit, onko rinnoissasi kyhmyjä?**

- useammin kuin kaksi kertaa vuodessa
- kaksi kertaa vuodessa
- kerran vuodessa
- harvemmin kuin kerran vuodessa

**27. Oletko koskaan ollut mammografia-tutkimuksessa (rintojen röntgentutkimuksessa)?**

- kyllä
- en, siirry kysymykseen 31.

**28. Kuinka vanhana kävit ensimmäistä kertaa mammografiatutkimuksessa?**

- alle 40-vuotiaana     55-59-vuotiaana
- 40-44-vuotiaana     60-64-vuotiaana
- 45-49-vuotiaana     65-69-vuotiaana
- 50-54-vuotiaana     70-vuotiaana tai vanhempana

**29. Kuinka vanha olit, kun kävit viimeksi mammografiatutkimuksessa?**

- alle 40-vuotiaana     55-59-vuotiaana
- 40-44-vuotiaana     60-64-vuotiaana
- 45-49-vuotiaana     65-69-vuotiaana
- 50-54-vuotiaana     70-vuotiaana tai vanhempana

**30. Kuinka monta kertaa yhteensä olet käynyt mammografiatutkimuksessa?**

- kerran
- kaksi - kolme kertaa
- neljä - viisi kertaa
- kuusi kertaa tai useammin

**31. Onko sinulla koskaan todettu hyvänlaatuista kyhmyä rinnassa?**

- kyllä
- ei, siirry kysymykseen 33.
- en osaa sanoa, siirry kysymykseen 33.

**32. Millainen hyvänlaatuinen kyhmy oli tai kyhmyt olivat? Merkitse myös arviosi toteamisvuodesta. Jos sinulla on todettu useita kertoja samanlaatuinen kyhmy, merkitse vain ensimmäinen toteamisvuosi.**

|                                                     | toteamisvuosi |  |  |  |
|-----------------------------------------------------|---------------|--|--|--|
| <input type="checkbox"/> en tiedä minkälainen kyhmy |               |  |  |  |
| <input type="checkbox"/> yksittäinen kysta          |               |  |  |  |
| <input type="checkbox"/> hyperplasia                |               |  |  |  |
| <input type="checkbox"/> mastiitti                  |               |  |  |  |
| <input type="checkbox"/> hormonikysta               |               |  |  |  |
| <input type="checkbox"/> adenoma                    |               |  |  |  |
| <input type="checkbox"/> kystoadenoma               |               |  |  |  |
| <input type="checkbox"/> fibroadenoma               |               |  |  |  |
| <input type="checkbox"/> jokin muu                  |               |  |  |  |

**33. Onko sinulla koskaan todettu rintasyöpää?**

- ei, siirry kysymykseen 38.
- en osaa sanoa, siirry kysymykseen 38.
- kyllä

**34. Minä vuonna rintasyöpä todettiin?**

Vuosi

|  |  |  |  |
|--|--|--|--|
|  |  |  |  |
|--|--|--|--|

**35. Todettiinko silloin etäpesäkkeitä?**

- ei
- en osaa sanoa
- kyllä

**36. Miten rintasyöpä hoidettiin?**

**a. leikkauksella**

- kyllä
- ei

**b. solumyrkyillä (kemoterapialla)**

- kyllä
- ei

**c. sädehoidolla**

- kyllä
- ei

37. Mitä muuta hoitoa rintasyöpään annettiin? \_\_\_\_\_

38. Onko sinulla todettu jokin muu syöpä?

- ei, siirry kysymykseen 41.  
 en osaa sanoa, siirry kysymykseen 41.  
 kyllä

39. Mikä syöpä se oli? \_\_\_\_\_

40. Minä vuonna se todettiin? Vuosi 

|  |  |  |  |
|--|--|--|--|
|  |  |  |  |
|--|--|--|--|

41. Onko äidilläsi, siskollasi tai tyttärelläsi todettu rintasyöpä?

- ei, siirry kysymykseen 43.  
 kyllä

42. Kellä heistä on todettu rintasyöpä?

- äidillä  
 siskolla  
 tyttärellä, minulla on 

|  |  |
|--|--|
|  |  |
|--|--|

 siskoa ja 

|  |  |
|--|--|
|  |  |
|--|--|

 tytärtä

43. Mikä on siviilisäätysi

- naimaton  
 naimisissa tai avoliitossa  
 eronnut tai asumuserossa  
 leski

44. Mikä on peruskoulutuksesi? (valitse vain yksi vaihtoehto)

- ei peruskoulutusta  
 kansakoulu/kansalaiskoulu  
 peruskoulu/keskikoulu  
 ylioppilastutkinto  
 ammattikorkeakoulu tai vastaava  
 korkeakoulututkinto

#### 45. Kuinka pitkä olet?

merkitse ruutuun metri, 10-sentit ja sentit

|           |                          |                          |                          |                          |                          |                          |                          |                          |                          |                          |
|-----------|--------------------------|--------------------------|--------------------------|--------------------------|--------------------------|--------------------------|--------------------------|--------------------------|--------------------------|--------------------------|
|           | 0                        | 1                        | 2                        |                          |                          |                          |                          |                          |                          |                          |
| metrit    | <input type="checkbox"/> | <input type="checkbox"/> | <input type="checkbox"/> |                          |                          |                          |                          |                          |                          |                          |
|           | 0                        | 1                        | 2                        | 3                        | 4                        | 5                        | 6                        | 7                        | 8                        | 9                        |
| 10-sentit | <input type="checkbox"/> | <input type="checkbox"/> | <input type="checkbox"/> | <input type="checkbox"/> | <input type="checkbox"/> | <input type="checkbox"/> | <input type="checkbox"/> | <input type="checkbox"/> | <input type="checkbox"/> | <input type="checkbox"/> |
|           | 0                        | 1                        | 2                        | 3                        | 4                        | 5                        | 6                        | 7                        | 8                        | 9                        |
| sentit    | <input type="checkbox"/> | <input type="checkbox"/> | <input type="checkbox"/> | <input type="checkbox"/> | <input type="checkbox"/> | <input type="checkbox"/> | <input type="checkbox"/> | <input type="checkbox"/> | <input type="checkbox"/> | <input type="checkbox"/> |

#### 46. Kuinka paljon painat?

merkitse ruutuun sadat kilot, kymmenkilot ja kilot

|             |                          |                          |                          |                          |                          |                          |                          |                          |                          |                          |
|-------------|--------------------------|--------------------------|--------------------------|--------------------------|--------------------------|--------------------------|--------------------------|--------------------------|--------------------------|--------------------------|
|             | 0                        | 1                        | 2                        |                          |                          |                          |                          |                          |                          |                          |
| sadat kilot | <input type="checkbox"/> | <input type="checkbox"/> | <input type="checkbox"/> |                          |                          |                          |                          |                          |                          |                          |
|             | 0                        | 1                        | 2                        | 3                        | 4                        | 5                        | 6                        | 7                        | 8                        | 9                        |
| 10-kilot    | <input type="checkbox"/> | <input type="checkbox"/> | <input type="checkbox"/> | <input type="checkbox"/> | <input type="checkbox"/> | <input type="checkbox"/> | <input type="checkbox"/> | <input type="checkbox"/> | <input type="checkbox"/> | <input type="checkbox"/> |
|             | 0                        | 1                        | 2                        | 3                        | 4                        | 5                        | 6                        | 7                        | 8                        | 9                        |
| kilot       | <input type="checkbox"/> | <input type="checkbox"/> | <input type="checkbox"/> | <input type="checkbox"/> | <input type="checkbox"/> | <input type="checkbox"/> | <input type="checkbox"/> | <input type="checkbox"/> | <input type="checkbox"/> | <input type="checkbox"/> |

#### 47. Oletko koskaan polttanut savukkeita säännöllisesti (päivittäin tai lähes päivittäin)?

en, siirry kysymykseen 53.

kyllä

#### 48. Minkä ikäisenä aloitit savukkeiden polton säännöllisesti?

alle 13 vuotiaana       22-24-vuotiaana

13-15-vuotiaana       25-27-vuotiaana

16-18-vuotiaana       28-vuotiaana tai vanhempana

19-21-vuotiaana

#### 49. Montako vuotta olet yhteensä polttanut savukkeita? Yritä vähentää määrästä tupakkalakot.

alle vuoden       8-12 vuotta

1-2 vuotta       13-19-vuotta

3-7 vuotta       20 vuotta tai kauemmin

#### 50. Mikä on ollut keskimäärin poltettujen savukkeiden määrä päivässä?

alle 5 savuketta

5-9 savuketta

10-19 savuketta

20-29 savuketta

30 savuketta tai enemmän

**51. Poltatko edelleen savukkeita?**

- kyllä, siirry kysymykseen 53.  
 en

**52. Minkä ikäisenä lopetit savukkeiden polton?**

- alle 15 vuotiaana     41-50-vuotiaana  
 16-20-vuotiaana     51-60-vuotiaana  
 21-30-vuotiaana     61-vuotiaana tai vanhempana  
 31-40-vuotiaana

**53. Kuinka usein juot alkoholijuomia?**

- en koskaan  
 vain erityisissä tilaisuuksissa  
 kolmena päivänä viikossa tai harvemmin  
 neljänä päivänä viikossa tai useammin

**54. Kuinka usein ruumiillinen liikunta aiheuttaa sinulle selvän hengästymisen ja pulssin lisääntymisen?**

- ei koskaan  
 kerran kuussa tai harvemmin  
 2-3 kertaa kuussa  
 noin kerran viikossa  
 useita kertoja viikossa  
 päivittäin

**55. Onko sinulla koskaan ollut jokin muu lääkitys kuin hormonivalmiste, jota olet käyttänyt yli kuukauden ajan?**

- ei  
 kyllä, mikä valmiste? \_\_\_\_\_  
\_\_\_\_\_

**56. Kun ajattelet aikaa kymmenen vuotta sitten, arvioi, montako tuntia nukuit yleensä vuorokaudessa?**

- 6 tuntia tai vähemmän     8.5 tuntia  
 6.5 tuntia     9 tuntia  
 7 tuntia     9.5 tuntia  
 7.5 tuntia     10 tuntia tai enemmän  
 8 tuntia

**57. Oletko koskaan värjätty tai värjännyt hiuksiasi?**

- en koskaan, siirry kysymykseen 60.
- 1-2 kertaa
- 3-9 kertaa
- 10-34 kertaa
- 35-89 kertaa
- 90 kertaa tai useammin

**58. Minkä ikäisenä värjäytit tai värjäsit hiuksesi ensimmäisen kerran?**

- alle 20 vuotiaana
- 20-29 vuotiaana
- 30-39 vuotiaana
- 40-vuotiaana tai vanhempana

**59. Koeta muistella, millä tavalla hiustesi värjäykset ovat tapahtuneet.**

**a.värillä, joka huuhtoutuu seuraavassa hiusten pesussa.**

- usein
- melko usein
- harvoin
- ei koskaan

**b.värillä, joka huuhtoutuu vasta usean pesun jälkeen**

- usein
- melko usein
- harvoin
- ei koskaan

**c.pysyvällä värillä, joka ei lähde pesemällä**

- usein
- melko usein
- harvoin
- ei koskaan

**d.ennen värjäystä hiuksesi valkaistiin**

- usein
- melko usein
- harvoin
- ei koskaan

**e.vain osa hiuksista värjättiin eli tehtiin raitoja**

- usein
- melko usein
- harvoin
- ei koskaan

**60. Seuraavassa luetellaan joukko tapahtumia, joita elämässä voi sattua. Jos tapahtuma on sattunut sinulle, vastaa, milloin se on sattunut. Vastaa myös, kuinka raskas koettelu tapahtuma on ollut merkitsemällä varattuun tilaan numero ohjeen mukaan.**

|                                                                              | Tapahtuma sattui:        |                                |                                |                          | Tapahtuman raskaus:      |                          |                          |
|------------------------------------------------------------------------------|--------------------------|--------------------------------|--------------------------------|--------------------------|--------------------------|--------------------------|--------------------------|
|                                                                              | ei ollenkaan             | viimeisen kahden vuoden aikana | Viimeisen viiden vuoden aikana | aikaisemmin              | 1 = ei kovin raskas      | 2 = raskas               | 3 = äärimmäisen raskas   |
| Puolison kuolema                                                             | <input type="checkbox"/> | <input type="checkbox"/>       | <input type="checkbox"/>       | <input type="checkbox"/> | <input type="checkbox"/> | <input type="checkbox"/> | <input type="checkbox"/> |
| Oman lapsen kuolema                                                          | <input type="checkbox"/> | <input type="checkbox"/>       | <input type="checkbox"/>       | <input type="checkbox"/> | <input type="checkbox"/> | <input type="checkbox"/> | <input type="checkbox"/> |
| Isän kuolema                                                                 | <input type="checkbox"/> | <input type="checkbox"/>       | <input type="checkbox"/>       | <input type="checkbox"/> | <input type="checkbox"/> | <input type="checkbox"/> | <input type="checkbox"/> |
| Äidin kuolema                                                                | <input type="checkbox"/> | <input type="checkbox"/>       | <input type="checkbox"/>       | <input type="checkbox"/> | <input type="checkbox"/> | <input type="checkbox"/> | <input type="checkbox"/> |
| Muun läheisen sukulaisen kuolema                                             | <input type="checkbox"/> | <input type="checkbox"/>       | <input type="checkbox"/>       | <input type="checkbox"/> | <input type="checkbox"/> | <input type="checkbox"/> | <input type="checkbox"/> |
| Hyvän ystävän kuolema                                                        | <input type="checkbox"/> | <input type="checkbox"/>       | <input type="checkbox"/>       | <input type="checkbox"/> | <input type="checkbox"/> | <input type="checkbox"/> | <input type="checkbox"/> |
| Perheenjäsenen vakava sairastuminen                                          | <input type="checkbox"/> | <input type="checkbox"/>       | <input type="checkbox"/>       | <input type="checkbox"/> | <input type="checkbox"/> | <input type="checkbox"/> | <input type="checkbox"/> |
| Raskauden keskeytys (oma tai kumppanin)                                      | <input type="checkbox"/> | <input type="checkbox"/>       | <input type="checkbox"/>       | <input type="checkbox"/> | <input type="checkbox"/> | <input type="checkbox"/> | <input type="checkbox"/> |
| Keskenmeno (oma tai kumppanin)                                               | <input type="checkbox"/> | <input type="checkbox"/>       | <input type="checkbox"/>       | <input type="checkbox"/> | <input type="checkbox"/> | <input type="checkbox"/> | <input type="checkbox"/> |
| Huomattavat vaikeudet esimiehen kanssa                                       | <input type="checkbox"/> | <input type="checkbox"/>       | <input type="checkbox"/>       | <input type="checkbox"/> | <input type="checkbox"/> | <input type="checkbox"/> | <input type="checkbox"/> |
| Huomattavat vaikeudet työtovereiden kanssa                                   | <input type="checkbox"/> | <input type="checkbox"/>       | <input type="checkbox"/>       | <input type="checkbox"/> | <input type="checkbox"/> | <input type="checkbox"/> | <input type="checkbox"/> |
| Oman taloudellisen tilanteen huomattava vaikeutuminen                        | <input type="checkbox"/> | <input type="checkbox"/>       | <input type="checkbox"/>       | <input type="checkbox"/> | <input type="checkbox"/> | <input type="checkbox"/> | <input type="checkbox"/> |
| Avioero, avoero tai asumusero                                                | <input type="checkbox"/> | <input type="checkbox"/>       | <input type="checkbox"/>       | <input type="checkbox"/> | <input type="checkbox"/> | <input type="checkbox"/> | <input type="checkbox"/> |
| Ristiriitojen huomattava lisääntyminen avo- tai aviopuolison kanssa (ei ero) | <input type="checkbox"/> | <input type="checkbox"/>       | <input type="checkbox"/>       | <input type="checkbox"/> | <input type="checkbox"/> | <input type="checkbox"/> | <input type="checkbox"/> |
| Välien rikkoutuminen pitkäaikaisessa ystävyys-suhteessa                      | <input type="checkbox"/> | <input type="checkbox"/>       | <input type="checkbox"/>       | <input type="checkbox"/> | <input type="checkbox"/> | <input type="checkbox"/> | <input type="checkbox"/> |
| Työpaikan menetys                                                            | <input type="checkbox"/> | <input type="checkbox"/>       | <input type="checkbox"/>       | <input type="checkbox"/> | <input type="checkbox"/> | <input type="checkbox"/> | <input type="checkbox"/> |
| Eläkkeelle siirtyminen                                                       | <input type="checkbox"/> | <input type="checkbox"/>       | <input type="checkbox"/>       | <input type="checkbox"/> | <input type="checkbox"/> | <input type="checkbox"/> | <input type="checkbox"/> |
| Puolison/kumppanin työttömyys                                                | <input type="checkbox"/> | <input type="checkbox"/>       | <input type="checkbox"/>       | <input type="checkbox"/> | <input type="checkbox"/> | <input type="checkbox"/> | <input type="checkbox"/> |
| Yli kolmen viikon työkyvyttömyyden aiheuttanut sairaus                       | <input type="checkbox"/> | <input type="checkbox"/>       | <input type="checkbox"/>       | <input type="checkbox"/> | <input type="checkbox"/> | <input type="checkbox"/> | <input type="checkbox"/> |
| Vakava tapaturma                                                             | <input type="checkbox"/> | <input type="checkbox"/>       | <input type="checkbox"/>       | <input type="checkbox"/> | <input type="checkbox"/> | <input type="checkbox"/> | <input type="checkbox"/> |
| Ruumiillinen tai seksuaalinen väkivalta                                      | <input type="checkbox"/> | <input type="checkbox"/>       | <input type="checkbox"/>       | <input type="checkbox"/> | <input type="checkbox"/> | <input type="checkbox"/> | <input type="checkbox"/> |
| Henkinen väkivalta                                                           | <input type="checkbox"/> | <input type="checkbox"/>       | <input type="checkbox"/>       | <input type="checkbox"/> | <input type="checkbox"/> | <input type="checkbox"/> | <input type="checkbox"/> |

**61. Onko sinun elämässäsi sattunut jokin huomattava myönteinen kokemus tai tapahtuma?**

|                             | ei<br>ollen-<br>kaan     | viimeisen<br>kahden<br>vuoden<br>aikana | Viimeisen<br>viiden<br>vuoden<br>aikana | aikai-<br>semmin         |
|-----------------------------|--------------------------|-----------------------------------------|-----------------------------------------|--------------------------|
| perhe-elämässä              | <input type="checkbox"/> | <input type="checkbox"/>                | <input type="checkbox"/>                | <input type="checkbox"/> |
| työelämässä                 | <input type="checkbox"/> | <input type="checkbox"/>                | <input type="checkbox"/>                | <input type="checkbox"/> |
| ihmissuhteissa              | <input type="checkbox"/> | <input type="checkbox"/>                | <input type="checkbox"/>                | <input type="checkbox"/> |
| hengellisessä elämässä      | <input type="checkbox"/> | <input type="checkbox"/>                | <input type="checkbox"/>                | <input type="checkbox"/> |
| taloudellisessa tilanteessa | <input type="checkbox"/> | <input type="checkbox"/>                | <input type="checkbox"/>                | <input type="checkbox"/> |
| asumisessa                  | <input type="checkbox"/> | <input type="checkbox"/>                | <input type="checkbox"/>                | <input type="checkbox"/> |
| harrastuksissa              | <input type="checkbox"/> | <input type="checkbox"/>                | <input type="checkbox"/>                | <input type="checkbox"/> |
| rakastuminen                | <input type="checkbox"/> | <input type="checkbox"/>                | <input type="checkbox"/>                | <input type="checkbox"/> |

**KIITÄMME VAIVANNÄÖSTÄSI!**

Pyydämme Sinua vielä ystävällisesti tarkistamaan, että olet vastannut kaikkiin kysymyksiin annettujen ohjeiden mukaisesti.

**HUOMAA!** Henkilöllisyytesi ja tietosi pidetään täysin salassa. Saatuja tutkimustuloksia ei tarkastella henkilöittäin, vaan niitä käsitellään taulukoituina. Nimesi ei tule esiin missään vaiheessa.
