# Supplementary material for: Does Hair Dye Use Increase the Risk of Breast Cancer? A Population-Based Case-Control Study of Finnish Women
Source: PubMed Central journal article supplement (PMC4532449; doi:10.1371/journal.pone.0135190), 2015-08-11
Supplement: pone.0135190.s004.pdf [file pone.0135190.s004.pdf]

SURVEY "Women's health and use of hormones"

Partial translation from the original survey (from Finnish to English). For informational use only.

*Question no. 1. Have you ever been pregnant?*

YES

NO

*Question no. 2. How many children have you given birth to?*

ONE

TWO

THREE – FOUR

FIVE – SIX

SEVEN OR MORE

*Question no. 7. Have you ever used hormonal contraceptives, such as oral contraceptive pills, contraceptive patches, contraceptive injections and/or contraceptive implant for contraceptive purpose?*

YES

NO. Move to question no. 10

*Question no. 12. How long in total have you used the above mentioned hormonal contraceptives for contraceptive purposes or as treatment for missing, painful or irregular menstruation or acne? (Try to estimate the total duration of all using periods combined)*

I HAVE NEVER USED. Move to question no. 15.

LESS THAN 1 MONTH

1 MONTH – 6 MONTHS

OVER 6 MONTHS BUT LESS THAN 2 YEARS

2 - 4 YEARS

OVER 4 YEARS – 8 YEARS

OVER 8 YEARS – 12 YEARS

OVER 12 YEARS – 16 YEARS

OVER 16 YEARS – 20 YEARS

OVER 20 YEARS – 25 YEARS

OVER 25 YEARS

*Question no. 17. How old were you when you first started menstruating?*

I HAVE NEVER HAD PERIODS

12 YEARS OLD OR YOUNGER

13 YEARS OLD

14 YEARS OLD

15 YEARS OLD

16 YEARS OLD

17 YEARS OLD  
18 YEARS OLD  
19 YEARS OLD  
20 YEARS OLD  
21 YEARS OLD  
22 YEARS OLD OR OLDER  
I DON'T KNOW

*Question no. 19. Have you ever received hormonal replacement therapy for menopausal symptoms or due to oophorectomy (removal of the ovaries)?*

YES  
NO. Move to question no. 25.  
I DON'T KNOW

*Question no. 20. How old were you when the hormone replacement therapy started?*

40 YEARS OR YOUNGER  
41-45 YEARS OLD  
46-50 YEARS OLD  
51-55 YEARS OLD  
56-60 YEARS OLD  
61-65 YEARS OLD  
66 YEARS OR OLDER  
I DON'T KNOW

*Question no. 22. How old were you when you stopped the hormone replacement therapy?*

40 YEARS OR YOUNGER  
41-45 YEARS OLD  
46-50 YEARS OLD  
51-55 YEARS OLD  
56-60 YEARS OLD  
61-65 YEARS OLD  
66-70 YEARS OLD  
71-75 YEARS OLD  
76 YEARS OR OLDER

*Question no. 23. How long in total have you used hormone replacement therapy? (Try to estimate the total duration of all using periods combined)*

LESS THAN 1 MONTH  
1 MONTH – 6 MONTHS  
OVER 6 MONTHS BUT LESS THAN 2 YEARS  
2 - 4 YEARS  
OVER 4 YEARS – 8 YEARS  
OVER 8 YEARS – 12 YEARS  
OVER 12 YEARS – 16 YEARS

OVER 16 YEARS – 20 YEARS  
OVER 20 YEARS – 25 YEARS  
OVER 25 YEARS

*Question no. 41. Has your mother, sister or daughter ever been diagnosed with breast cancer?*

NO. Move to question no. 43.  
YES

*Question no. 43. What is your marital status?*

SINGLE  
MARRIED OR COMMON-LAW-MARRIAGE  
DIVORCED OR SEPARATED  
WIDOWED

*Question no. 44. What is your basic education? (Please choose only one option)*

NO BASIC EDUCATION  
PRIMARY SCHOOL/ELEMENTARY SCHOOL  
COMPREHENSIVE SCHOOL  
MATRICULATION EXAMINATION (HIGH SCHOOL)  
POLYTECHNIC OR SIMILAR  
UNIVERSITY-LEVEL DEGREE

*Question no. 47. Have you ever smoked cigarettes regularly (daily or almost daily)?*

NO. Move to question no. 53.  
YES

*Question no. 53. How often do you consume alcoholic drinks?*

NEVER  
ONLY IN SPECIAL OCCASIONS  
IN THREE DAYS PER WEEK OR LESS  
IN FOUR DAYS PER WEEK OR MORE

*Question no. 57. Have you ever or have you ever had your hair dyed?*

NEVER. Move to question no. 60.  
1-2 TIMES  
3-9 TIMES  
10-34 TIMES  
35-89 TIMES  
≥ 90 TIMES

*Question no. 58. At what age did you dye or had your hair dyed for the first time?*

AT UNDER 20 YEARS OF AGE  
AT 20-29 YEARS OF AGE

AT 30-39 YEARS OF AGE

AT 40 YEARS OF AGE OF OLDER

*Question no. 59. Try to remember the way you hair was dyed.*

- A. *Using a color that washes off at first wash*
  - OFTEN
  - QUITE OFTEN
  - RARELY
  - NEVER
- B. *Using a color that washes off after several washes*
  - OFTEN
  - QUITE OFTEN
  - RARELY
  - NEVER
- C. *Using a color that does not wash off*
  - OFTEN
  - QUITE OFTEN
  - RARELY
  - NEVER
- D. *The hair was bleached before dyeing*
  - OFTEN
  - QUITE OFTEN
  - RARELY
  - NEVER
- E. *Only a part of the hair was dyed, i.e. it was highlighted/low-lighted*
  - OFTEN
  - QUITE OFTEN
  - RARELY
  - NEVER
